# Supplementary material
Source: publisher figshare collection journal article supplement (https://brill.figshare.com/articles/dataset/_/21214067)
Supplement: Supplementary file 1 [file 1]

An isolated crested newt population in Dutch coastal dunes:  
distribution relict or introduction?

Jurian de Brouwer<sup>1,2,\*</sup>, Bas Helder<sup>1,2,\*</sup>, James France<sup>1,2</sup>, Manon C. de Visser<sup>1,2</sup>, Richard

P.J.H. Struijk<sup>3</sup>, Ben Wielstra<sup>1,2,\*\*</sup>

1 - Naturalis Biodiversity Center, P.O. Box 9517, 2300 RA Leiden, The Netherlands

2 - Institute of Biology Leiden, Leiden University, P.O. Box 9505, 2300 RA Leiden,  
The Netherlands

3 - Reptile, Amphibian and Fish Conservation Netherlands (RAVON), P.O. Box 1413,  
6501 BK Nijmegen, The Netherlands

\*These authors contributed equally to this work.

\*\*Corresponding author; e-mail: ben.wielstra@naturalis.nl

ORCID iD: Wielstra: 0000-0002-7112-5965

**Supplementary material**

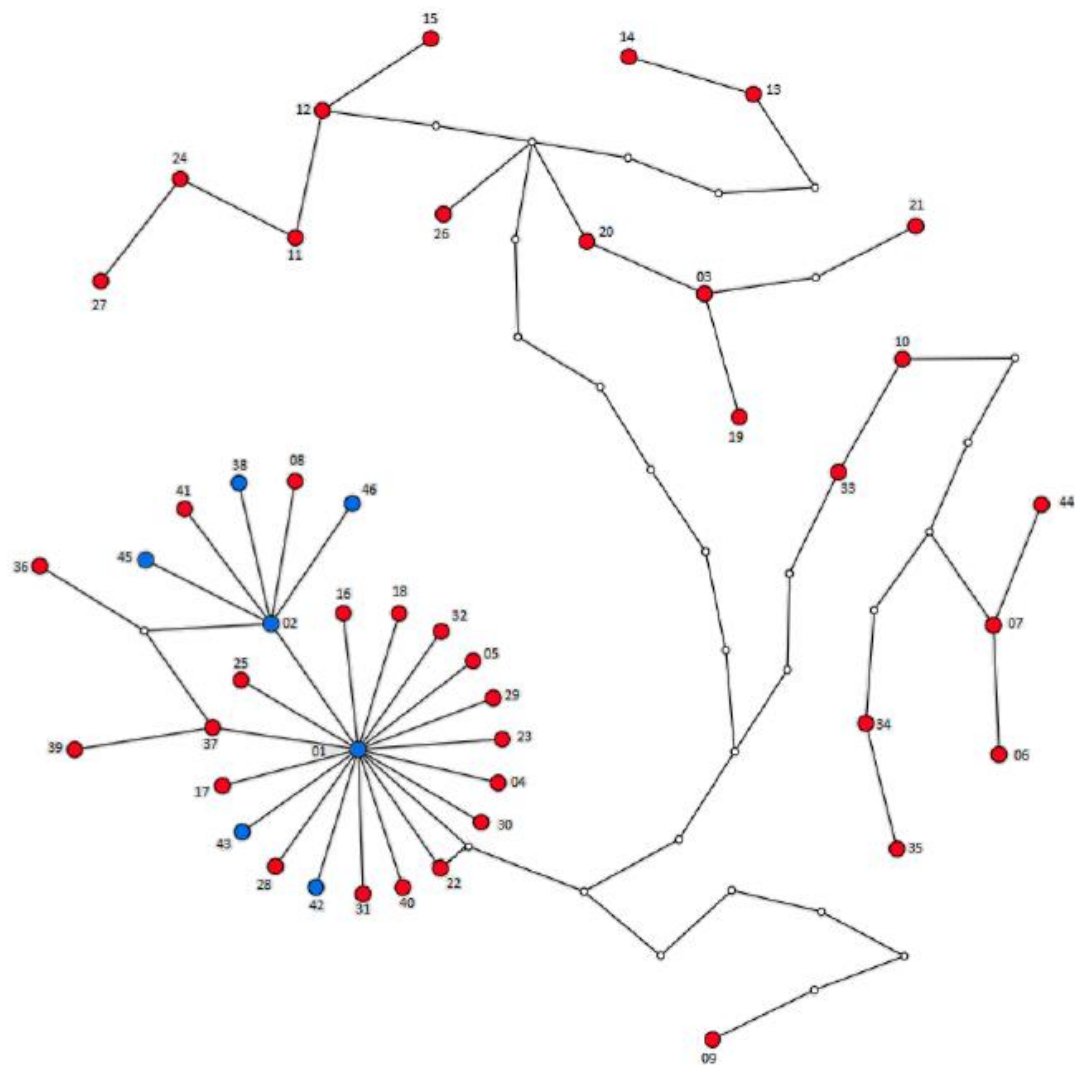

**Figure S1.** Haplotype network based on all ND4 mtDNA haplotypes of the northern crested newt *Triturus cristatus*. Note that, because haplotype frequencies outside the Netherlands were not available, we did not incorporate haplotype frequencies. Numbers correspond to the haplotype codes in supplementary table S1 (with the prefix “Tcri” not shown). Blue haplotypes were (also) recorded in the Netherlands, red ones not.

**Table S1.** Sampling details for northern crested newt (*Triturus cristatus*) populations.
